# Supplementary figures and images for: Negative linear compressibility of molecular and ionic-molecular crystals
Source: Royal Society of Chemistry journal article supplement (doi:10.1039/d4cp03913k), 2024-12-23

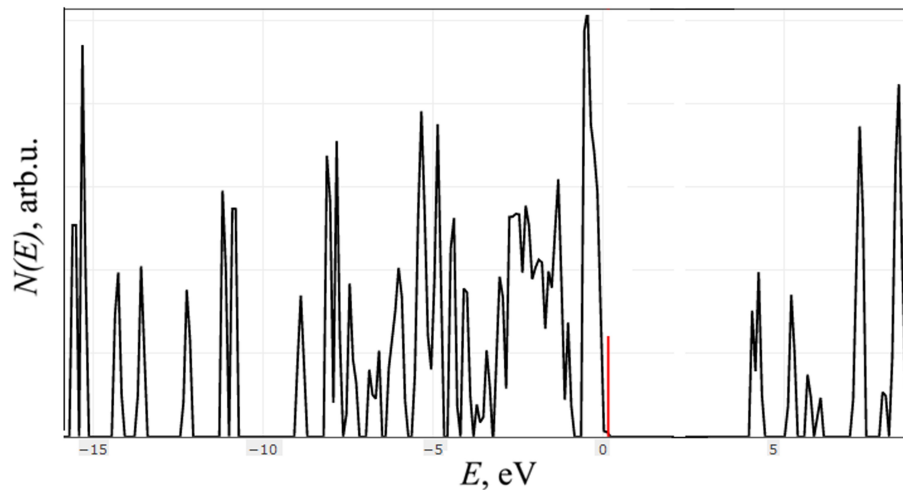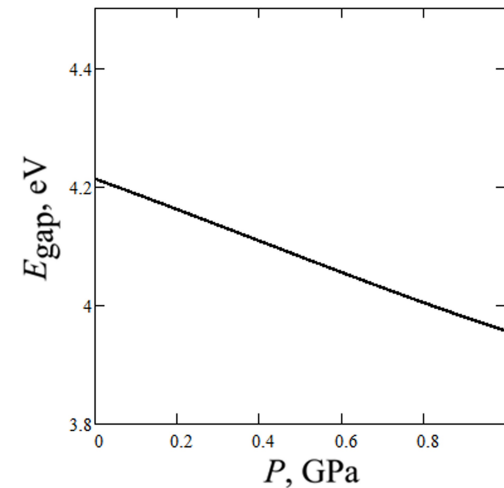

Supplement: d4cp03913k4.pdf [file d4cp03913k4.pdf]

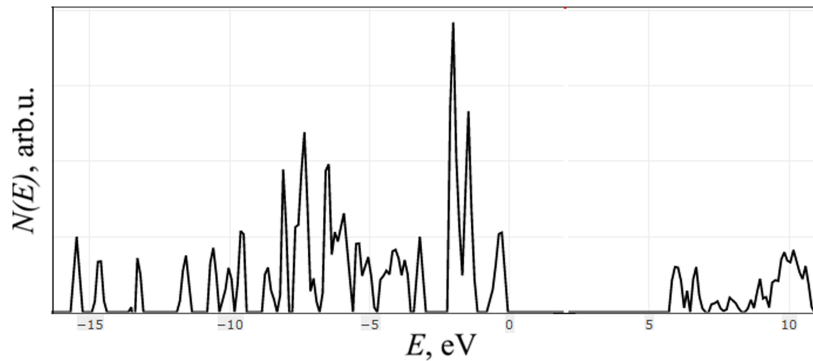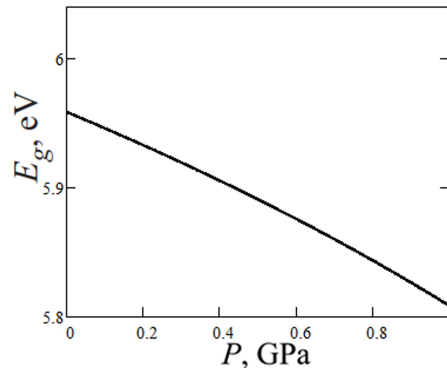

Supplement: d4cp03913k6.pdf [file d4cp03913k6.pdf]
